# Supplementary material for: Gastrointestinal parasites in non-human primates in zoological institutions in France
Source: PubMed Central journal article supplement (PMC9487514; doi:10.1051/parasite/2022040), 2022-09-20
Supplement: parasite-29-43-s1.pdf [file parasite-29-43-s1.pdf]

## Supplementary data I

### Questionnaire on gastrointestinal parasites in non-human primates of French zoological institutions and their diagnostic modalities

#### GENERAL INFORMATION

Name of the veterinarian:

Name of the institution:

Postal address of the institution:

E-mail address of the veterinarian:

**AGREEMENT TO PARTICIPATE TO THE PROJECT (yes/no):**

#### SPECIES OF NON-HUMAN PRIMATES HOUSED IN YOUR INSTITUTION

##### WHAT SPECIES OF PRIMATES ARE HOUSED IN YOUR INSTITUTION?

- |                                                             |                                                                 |                                                             |                                                          |
|-------------------------------------------------------------|-----------------------------------------------------------------|-------------------------------------------------------------|----------------------------------------------------------|
| <input type="checkbox"/> <i>Eulemur cinereiceps</i>         | <input type="checkbox"/> <i>Tarsius spp.</i>                    | <input type="checkbox"/> <i>Chlorocebus spp.</i>            | <input type="checkbox"/> <i>Symphalangus syndactylus</i> |
| <input type="checkbox"/> <i>Eulemur (macaco) flavifrons</i> | <input type="checkbox"/> <i>Lagothrix spp.</i>                  | <input type="checkbox"/> <i>Cercopithecus roloway</i>       | <input type="checkbox"/> <i>Nomascus leucogenys</i>      |
| <input type="checkbox"/> <i>Eulemur coronatus</i>           | <input type="checkbox"/> <i>Saimiri sciureus</i>                | <input type="checkbox"/> <i>Cercopithecus lhoesti</i>       | <input type="checkbox"/> <i>Nomascus siki</i>            |
| <input type="checkbox"/> <i>Eulemur mongoz</i>              | <input type="checkbox"/> <i>Saimiri boliviensis</i>             | <input type="checkbox"/> <i>Cercopithecus hamlyni</i>       | <input type="checkbox"/> <i>Nomascus gabriellae</i>      |
| <input type="checkbox"/> <i>Eulemur rubriventer</i>         | <input type="checkbox"/> <i>Saimiri boliviensis boliviensis</i> | <input type="checkbox"/> <i>Cercopithecus neglectus</i>     | <input type="checkbox"/> <i>Nomascus siki</i>            |
| <input type="checkbox"/> <i>Eulemur fulvus</i>              | <input type="checkbox"/> <i>Saimiri boliviensis peruviansis</i> | <input type="checkbox"/> <i>Cercopithecus diana</i>         | <input type="checkbox"/> <i>Nomascus gabriellae</i>      |
| <input type="checkbox"/> <i>Eulemus macaco</i>              | <input type="checkbox"/> <i>Saguinus bicolor</i>                | <input type="checkbox"/> <i>Cercopithecus nictitans</i>     | <input type="checkbox"/> <i>Hylobates pileatus</i>       |
| <input type="checkbox"/> <i>Lemur catta</i>                 | <input type="checkbox"/> <i>Saguinus midas</i>                  | <input type="checkbox"/> <i>Allenopithecus nigriviridis</i> | <input type="checkbox"/> <i>Hylobates lar</i>            |
| <input type="checkbox"/> <i>Hapalemur alaotrensis</i>       | <input type="checkbox"/> <i>Saguinus midas</i>                  | <input type="checkbox"/> <i>Macaca tonkeana</i>             | <input type="checkbox"/> <i>Hylobates muelleri</i>       |
| <input type="checkbox"/> <i>Prolemur simus</i>              | <input type="checkbox"/> <i>Saguinus imperator</i>              | <input type="checkbox"/> <i>Macaca silenus</i>              | <input type="checkbox"/> <i>Gorilla gorilla</i>          |
| <input type="checkbox"/> <i>Propithecus coronatus</i>       | <input type="checkbox"/> <i>Saguinus oedipus</i>                | <input type="checkbox"/> <i>Macaca nemestrina</i>           | <input type="checkbox"/> <i>Gorilla beringei</i>         |
| <input type="checkbox"/> <i>Varecia variegata subcincta</i> | <input type="checkbox"/> <i>Callimico goeldii</i>               | <input type="checkbox"/> <i>Macaca sylvanus</i>             | <input type="checkbox"/> <i>Pongo pygmaeus</i>           |
| <input type="checkbox"/> <i>Varecia variegata</i>           | <input type="checkbox"/> <i>Leontopithecus chrysomelas</i>      | <input type="checkbox"/> <i>Papio hamadryas</i>             | <input type="checkbox"/> <i>Pongo abelli</i>             |
| <input type="checkbox"/> <i>Galago senegalensis</i>         | <input type="checkbox"/> <i>Leontopithecus chrysomelas</i>      | <input type="checkbox"/> <i>Papio papio</i>                 | <input type="checkbox"/> <i>Pan troglodytes</i>          |
|                                                             | <input type="checkbox"/> <i>Leontopithecus rosalia</i>          | <input type="checkbox"/> <i>Papio anubis</i>                | <input type="checkbox"/> <i>Pan paniscus</i>             |
|                                                             | <input type="checkbox"/> <i>Callithrix jacchus</i>              | <input type="checkbox"/> <i>Theropithecus gelada</i>        | <input type="checkbox"/> Other                           |
|                                                             | <input type="checkbox"/> <i>Callithrix geoffroyi</i>            | <input type="checkbox"/> <i>Lophocebus aterrimus</i>        |                                                          |
|                                                             | <input type="checkbox"/> <i>Cebuella pygmaea</i>                | <input type="checkbox"/> <i>Cercocebus torquatus</i>        |                                                          |
|                                                             | <input type="checkbox"/> <i>Mico argentatus</i>                 | <input type="checkbox"/> <i>Mandrillus sphinx</i>           |                                                          |
|                                                             | <input type="checkbox"/> <i>Ateles hybridus</i>                 | <input type="checkbox"/> <i>Colobus spp.</i>                |                                                          |
|                                                             | <input type="checkbox"/> <i>Ateles paniscus</i>                 | <input type="checkbox"/> <i>Procolobus spp.</i>             |                                                          |
|                                                             | <input type="checkbox"/> <i>Ateles fusciceps rufiventris</i>    | <input type="checkbox"/> <i>Ptilocolobus spp.</i>           |                                                          |
|                                                             | <input type="checkbox"/> <i>Pithecia pithecia</i>               |                                                             |                                                          |
|                                                             | <input type="checkbox"/> <i>Chiropotes satanas</i>              |                                                             |                                                          |
|                                                             | <input type="checkbox"/> <i>Sapajus xanthosternos</i>           |                                                             |                                                          |
|                                                             | <input type="checkbox"/> <i>Cebus apella</i>                    |                                                             |                                                          |
|                                                             | <input type="checkbox"/> <i>Cebus capucinus</i>                 |                                                             |                                                          |
|                                                             | <input type="checkbox"/> <i>Alouatta spp.</i>                   |                                                             |                                                          |

#### FECAL SCREENINGS IN NON-HUMAN PRIMATES IN YOUR INSTITUTION

##### ARE FECAL SCREENING PERFORMED IN YOUR NON-HUMAN PRIMATE SPECIES (yes/no):

##### IF SO, IN WHAT SPECIES?

- |                                                             |                                                                 |                                                             |                                                          |
|-------------------------------------------------------------|-----------------------------------------------------------------|-------------------------------------------------------------|----------------------------------------------------------|
| <input type="checkbox"/> <i>Eulemur cinereiceps</i>         | <input type="checkbox"/> <i>Tarsius spp.</i>                    | <input type="checkbox"/> <i>Chlorocebus spp.</i>            | <input type="checkbox"/> <i>Symphalangus syndactylus</i> |
| <input type="checkbox"/> <i>Eulemur (macaco) flavifrons</i> | <input type="checkbox"/> <i>Lagothrix spp.</i>                  | <input type="checkbox"/> <i>Cercopithecus roloway</i>       | <input type="checkbox"/> <i>Hylobates pileatus</i>       |
| <input type="checkbox"/> <i>Eulemur coronatus</i>           | <input type="checkbox"/> <i>Saimiri sciureus</i>                | <input type="checkbox"/> <i>Cercopithecus lhoesti</i>       | <input type="checkbox"/> <i>Nomascus leucogenys</i>      |
| <input type="checkbox"/> <i>Eulemur mongoz</i>              | <input type="checkbox"/> <i>Saimiri boliviensis</i>             | <input type="checkbox"/> <i>Cercopithecus hamlyni</i>       | <input type="checkbox"/> <i>Nomascus siki</i>            |
| <input type="checkbox"/> <i>Eulemur rubriventer</i>         | <input type="checkbox"/> <i>Saimiri boliviensis boliviensis</i> | <input type="checkbox"/> <i>Cercopithecus neglectus</i>     | <input type="checkbox"/> <i>Nomascus gabriellae</i>      |
| <input type="checkbox"/> <i>Eulemur fulvus</i>              | <input type="checkbox"/> <i>Saimiri boliviensis peruviansis</i> | <input type="checkbox"/> <i>Cercopithecus diana</i>         | <input type="checkbox"/> <i>Hylobates lar</i>            |
| <input type="checkbox"/> <i>Eulemus macaco</i>              | <input type="checkbox"/> <i>Saguinus bicolor</i>                | <input type="checkbox"/> <i>Cercopithecus nictitans</i>     | <input type="checkbox"/> <i>Hylobates muelleri</i>       |
| <input type="checkbox"/> <i>Lemur catta</i>                 | <input type="checkbox"/> <i>Saguinus midas</i>                  | <input type="checkbox"/> <i>Allenopithecus nigriviridis</i> | <input type="checkbox"/> <i>Gorilla gorilla</i>          |
| <input type="checkbox"/> <i>Hapalemur alaotrensis</i>       | <input type="checkbox"/> <i>Saguinus midas</i>                  | <input type="checkbox"/> <i>Macaca tonkeana</i>             |                                                          |
| <input type="checkbox"/> <i>Prolemur simus</i>              | <input type="checkbox"/> <i>Callimico goeldii</i>               | <input type="checkbox"/> <i>Macaca silenus</i>              |                                                          |
| <input type="checkbox"/> <i>Propithecus coronatus</i>       | <input type="checkbox"/> <i>Saguinus imperator</i>              | <input type="checkbox"/> <i>Macaca nemestrina</i>           |                                                          |
| <input type="checkbox"/> <i>Varecia variegata subcincta</i> | <input type="checkbox"/> <i>Saguinus oedipus</i>                | <input type="checkbox"/> <i>Macaca sylvanus</i>             |                                                          |
| <input type="checkbox"/> <i>Varecia variegata</i>           |                                                                 | <input type="checkbox"/> <i>Papio hamadryas</i>             |                                                          |

- Galago senegalensis*
- Leontopithecus chrysomelas*
- Leontopithecus rosalia*
- Callithrix jacchus*
- Callithrix geoffroyi*
- Cebuella pygmaea*
- Mico argentatus*
- Ateles hybridus*
- Ateles paniscus*
- Ateles fusciceps rufiventris*
- Pithecia pithecia*
- Chiropotes satanas*
- Sapajus xanthosternos*
- Cebus apella*
- Cebus capucinus*
- Alouatta spp.*
- Papio papio*
- Papio anubis*
- Theropithecus gelada*
- Lophocebus aterrimus*
- Cercocebus torquatus*
- Mandrillus sphinx*
- Colobus spp.*
- Procolobus spp.*
- Ptilocolobus spp.*
- Gorilla beringei*
- Pongo pygmaeus*
- Pongo abelli*
- Pan troglodytes*
- Pan paniscus*
- Other

**METHODOLOGY OF FECAL SCREENINGS**

**AT WHAT FREQUENCY ARE FECAL SCREENINGS PERFORMED:**

**UNDER WHAT EPIDEMIOLOGICAL CIRCUMSTANCES ARE THESE SCREENING PERFORMED?**

- As routine diagnosis
- In case of digestive clinical signs within the group
- After infection periods
- In case of confirmed parasitosis in the group
- Other:

**WHICH ANIMALS ARE SAMPLED FOR THESE SCREENINGS**

- Sick individuals
- Healthy individuals

**WHAT PROPORTION OF THE ANIMALS ARE SAMPLED DURING THESE SCREENINGS?**

**WHAT DIAGNOSTIC METHODS ARE USED DURING THESE SCREENINGS?**

- Lugol staining
- Merthiolate-Iodine-Formaldehyde staining
- Modified Ziehl-Neelsen staining
- Coproculture
- Direct microscopic examination
- Flotation enrichment
- Sedimentation enrichment method
- Baermann enrichment method
- Kato enrichment method
- Ballenger enrichment method
- Faust enrichment method
- Ritchie enrichment method
- Telemann-Rivas enrichment method
- Willis enrichment method
- Other (please comment):

**PARASITIC BACKGROUND OF YOUR INSTITUTION**

**WHAT IS THE PARASITIC BACKGROUND OF SCREENED SPECIES? (add parasite species diagnosed if possible)**

| Species                            | Amoeba | Flagellates | Coccidia | Cestodes | Oxyurids | Strongylids | Other nematodes |
|------------------------------------|--------|-------------|----------|----------|----------|-------------|-----------------|
| <i>Eulemur cinereiceps</i>         |        |             |          |          |          |             |                 |
| <i>Eulemur (macaco) flavifrons</i> |        |             |          |          |          |             |                 |
| <i>Eulemur coronatus</i>           |        |             |          |          |          |             |                 |
| <i>Eulemur mongoz</i>              |        |             |          |          |          |             |                 |
| <i>Eulemur rubriventer</i>         |        |             |          |          |          |             |                 |
| <i>Eulemur fulvus</i>              |        |             |          |          |          |             |                 |
| <i>Eulemur macaco</i>              |        |             |          |          |          |             |                 |
| <i>Lemur catta</i>                 |        |             |          |          |          |             |                 |
| <i>Hapalemur alaotrensis</i>       |        |             |          |          |          |             |                 |
| <i>Prolemur simus</i>              |        |             |          |          |          |             |                 |
| <i>Propithecus coronatus</i>       |        |             |          |          |          |             |                 |
| <i>Varecia variegata subcincta</i> |        |             |          |          |          |             |                 |
| <i>Varecia variegata</i>           |        |             |          |          |          |             |                 |
| <i>Galago senegalensis</i>         |        |             |          |          |          |             |                 |

|                                        |  |  |  |  |  |  |  |
|----------------------------------------|--|--|--|--|--|--|--|
| <i>Tarsius spp.</i>                    |  |  |  |  |  |  |  |
| <i>Lagothrix spp.</i>                  |  |  |  |  |  |  |  |
| <i>Saimiri sciureus</i>                |  |  |  |  |  |  |  |
| <i>Saimiri boliviensis boliviensis</i> |  |  |  |  |  |  |  |
| <i>Saimiri boliviensis peruviansis</i> |  |  |  |  |  |  |  |
| <i>Saguinus bicolor</i>                |  |  |  |  |  |  |  |
| <i>Saguinus midas</i>                  |  |  |  |  |  |  |  |
| <i>Saguinus imperatoru</i>             |  |  |  |  |  |  |  |
| <i>Saguinus Oedipus</i>                |  |  |  |  |  |  |  |
| <i>Callimico goeldii</i>               |  |  |  |  |  |  |  |
| <i>Leontopithecus chrysomelas</i>      |  |  |  |  |  |  |  |
| <i>Leontopithecus rosalia</i>          |  |  |  |  |  |  |  |
| <i>Callithrix jacchus</i>              |  |  |  |  |  |  |  |
| <i>Callithrix geoffroyi</i>            |  |  |  |  |  |  |  |
| <i>Cebuella pygmaea</i>                |  |  |  |  |  |  |  |
| <i>Mico argentatus</i>                 |  |  |  |  |  |  |  |
| <i>Ateles hydribdus</i>                |  |  |  |  |  |  |  |
| <i>Ateles paniscus</i>                 |  |  |  |  |  |  |  |
| <i>Ateles fusciceps rufiventris</i>    |  |  |  |  |  |  |  |
| <i>Pithecia pithecia</i>               |  |  |  |  |  |  |  |
| <i>Chiropotes satanas</i>              |  |  |  |  |  |  |  |
| <i>Sapajus xanthosternos</i>           |  |  |  |  |  |  |  |
| <i>Cebus apella</i>                    |  |  |  |  |  |  |  |
| <i>Cebus capucinus</i>                 |  |  |  |  |  |  |  |
| <i>Alouatta spp.</i>                   |  |  |  |  |  |  |  |
| <i>Chlorocebus spp.</i>                |  |  |  |  |  |  |  |
| <i>Cercopithecus roloway</i>           |  |  |  |  |  |  |  |
| <i>Cercopithecus lhoesti</i>           |  |  |  |  |  |  |  |
| <i>Cercopithecus hamlyni</i>           |  |  |  |  |  |  |  |
| <i>Cercopithecus neglectus</i>         |  |  |  |  |  |  |  |
| <i>Cercopithecus diana</i>             |  |  |  |  |  |  |  |
| <i>Cercopithecus nictitans</i>         |  |  |  |  |  |  |  |
| <i>Allenopithecus nigriviridis</i>     |  |  |  |  |  |  |  |
| <i>Macaca tonkeana</i>                 |  |  |  |  |  |  |  |
| <i>Macaca silenus</i>                  |  |  |  |  |  |  |  |
| <i>Macaca nemestrina</i>               |  |  |  |  |  |  |  |
| <i>Macaca sylvanus</i>                 |  |  |  |  |  |  |  |
| <i>Papio hamadryas</i>                 |  |  |  |  |  |  |  |
| <i>Papio papio</i>                     |  |  |  |  |  |  |  |
| <i>Papio anubis</i>                    |  |  |  |  |  |  |  |
| <i>Theropithecus gelada</i>            |  |  |  |  |  |  |  |
| <i>Lophocebus aterrimus</i>            |  |  |  |  |  |  |  |
| <i>Cercocebus torquatus</i>            |  |  |  |  |  |  |  |
| <i>Mandrillus sphinx</i>               |  |  |  |  |  |  |  |
| <i>Colobus spp.</i>                    |  |  |  |  |  |  |  |
| <i>Procolobus spp.</i>                 |  |  |  |  |  |  |  |
| <i>Piliocolobus spp.</i>               |  |  |  |  |  |  |  |
| <i>Symphalangus syndactylus</i>        |  |  |  |  |  |  |  |
| <i>Nomascus leucogenys</i>             |  |  |  |  |  |  |  |
| <i>Nomascus siki</i>                   |  |  |  |  |  |  |  |
| <i>Nomascus gabriellae</i>             |  |  |  |  |  |  |  |
| <i>Hylobates pileatus</i>              |  |  |  |  |  |  |  |
| <i>Hylobates lar</i>                   |  |  |  |  |  |  |  |

|                           |  |  |  |  |  |  |  |
|---------------------------|--|--|--|--|--|--|--|
| <i>Hylobates muelleri</i> |  |  |  |  |  |  |  |
| <i>Gorilla gorilla</i>    |  |  |  |  |  |  |  |
| <i>Gorilla beringei</i>   |  |  |  |  |  |  |  |
| <i>Pongo pygmaeus</i>     |  |  |  |  |  |  |  |
| <i>Pongo abelli</i>       |  |  |  |  |  |  |  |
| <i>Pan troglodytes</i>    |  |  |  |  |  |  |  |
| <i>Pan paniscus</i>       |  |  |  |  |  |  |  |

**PARASITES IN OTHER SPECIES OF YOUR INSTITUTIONS**

**ARE THOSE PARASITES FOUND IN OTHER NON-PRIMATE SPECIES IN YOUR INSTITUTION (yes/no):**

**IF SO, IN WHAT SPECIES?**

|                                                                                                              |  |
|--------------------------------------------------------------------------------------------------------------|--|
| Amoeba ( <i>Entamoeba</i> , <i>Endolimax</i> , ...)                                                          |  |
| Flagellates ( <i>Giardia</i> , <i>Chilomastix</i> , <i>Enteromonas</i> , ...)                                |  |
| Blastocystis                                                                                                 |  |
| Coccidia ( <i>Cryptosporidium</i> , ...)                                                                     |  |
| Cestodes ( <i>Bertiella</i> , ...)                                                                           |  |
| Oxyurids ( <i>Enterobius</i> , ...)                                                                          |  |
| Strongyles ( <i>Ancylostoma</i> , <i>Ternidens</i> , <i>Oesophagostomum</i> , <i>Trichostrongylus</i> , ...) |  |
| Other nematodes ( <i>Trichuris</i> , <i>Ascaris</i> , <i>Strongyloides</i> , ...)                            |  |

**DEGREE OF CONFIDENCE**

**WHO CARRIES OUT FECAL SCREENINGS IN YOUR INSTITUTION**

- Zoo veterinarians  Veterinary students  
 Zookeepers  Other:

**WHAT IS THE DEGREE OF CONFIDENCE OF DIAGNOSIS (0-100):**

**IN CASE OF PARASITE IDENTIFICATION OR DOUBTFUL RESULTS, IS THE SAMPLE SCREENED BY A VETERINARIAN FOR SECOND OPINION (yes/no):**

**PROSPECTIVE FECAL SCREENINGS AT THE VETERINARY COLLEGE OF ALFORT**

**WHICH OF YOUR NON-HUMAN PRIMATE SPECIES WOULD YOU LIKE TO INCLUDE IN THE PROSPECTIVE STUDY?**

|                                                             |                                                                 |                                                             |                                                          |
|-------------------------------------------------------------|-----------------------------------------------------------------|-------------------------------------------------------------|----------------------------------------------------------|
| <input type="checkbox"/> <i>Eulemur cinereiceps</i>         | <input type="checkbox"/> <i>Tarsius spp.</i>                    | <input type="checkbox"/> <i>Chlorocebus spp.</i>            | <input type="checkbox"/> <i>Symphalangus syndactylus</i> |
| <input type="checkbox"/> <i>Eulemur (macaco) flavifrons</i> | <input type="checkbox"/> <i>Lagothrix spp.</i>                  | <input type="checkbox"/> <i>Cercopithecus roloway</i>       | <input type="checkbox"/> <i>Hylobates pileatus</i>       |
| <input type="checkbox"/> <i>Eulemur coronatus</i>           | <input type="checkbox"/> <i>Saimiri sciureus</i>                | <input type="checkbox"/> <i>Cercopithecus lhoesti</i>       | <input type="checkbox"/> <i>Nomascus leucogenys</i>      |
| <input type="checkbox"/> <i>Eulemur mongoz</i>              | <input type="checkbox"/> <i>Saimiri boliviensis boliviensis</i> | <input type="checkbox"/> <i>Cercopithecus hamlyni</i>       | <input type="checkbox"/> <i>Nomascus siki</i>            |
| <input type="checkbox"/> <i>Eulemur rubriventer</i>         | <input type="checkbox"/> <i>Saimiri boliviensis peruviansis</i> | <input type="checkbox"/> <i>Cercopithecus neglectus</i>     | <input type="checkbox"/> <i>Nomascus gabriellae</i>      |
| <input type="checkbox"/> <i>Eulemur fulvus</i>              | <input type="checkbox"/> <i>Saguinus bicolor</i>                | <input type="checkbox"/> <i>Cercopithecus diana</i>         | <input type="checkbox"/> <i>Hylobates lar</i>            |
| <input type="checkbox"/> <i>Eulemus macaco</i>              | <input type="checkbox"/> <i>Saguinus midas</i>                  | <input type="checkbox"/> <i>Cercopithecus nictitans</i>     | <input type="checkbox"/> <i>Hylobates muelleri</i>       |
| <input type="checkbox"/> <i>Lemur catta</i>                 | <input type="checkbox"/> <i>Callimico goeldii</i>               | <input type="checkbox"/> <i>Allenopithecus nigriviridis</i> | <input type="checkbox"/> <i>Gorilla gorilla</i>          |
| <input type="checkbox"/> <i>Hapalemur alaotrensis</i>       | <input type="checkbox"/> <i>Saguinus imperator</i>              | <input type="checkbox"/> <i>Macaca tonkeana</i>             | <input type="checkbox"/> <i>Gorilla beringei</i>         |
| <input type="checkbox"/> <i>Prolemur simus</i>              | <input type="checkbox"/> <i>Saguinus oedipus</i>                | <input type="checkbox"/> <i>Macaca Silenus</i>              | <input type="checkbox"/> <i>Pongo pygmaeus</i>           |
| <input type="checkbox"/> <i>Propithecus coronatus</i>       | <input type="checkbox"/> <i>Leontopithecus chrysomelas</i>      | <input type="checkbox"/> <i>Macaca nemestrina</i>           | <input type="checkbox"/> <i>Pongo abelli</i>             |
| <input type="checkbox"/> <i>Varecia variegata subcinta</i>  | <input type="checkbox"/> <i>Leontopithecus rosalia</i>          | <input type="checkbox"/> <i>Macaca sylvanus</i>             | <input type="checkbox"/> <i>Pan troglodytes</i>          |
| <input type="checkbox"/> <i>Varecia variegata</i>           | <input type="checkbox"/> <i>Callithrix jacchus</i>              | <input type="checkbox"/> <i>Papio hamadryas</i>             | <input type="checkbox"/> <i>Pan paniscus</i>             |
| <input type="checkbox"/> <i>Galago senegalensis</i>         | <input type="checkbox"/> <i>Callithrix geoffroyi</i>            | <input type="checkbox"/> <i>Papio papio</i>                 | <input type="checkbox"/> Other                           |
|                                                             | <input type="checkbox"/> <i>Cebuella pygmaea</i>                | <input type="checkbox"/> <i>Papio anubis</i>                |                                                          |
|                                                             | <input type="checkbox"/> <i>Mico argentatus</i>                 | <input type="checkbox"/> <i>Theropithecus gelada</i>        |                                                          |
|                                                             | <input type="checkbox"/> <i>Ateles hybridus</i>                 | <input type="checkbox"/> <i>Lophocebus aterrimus</i>        |                                                          |
|                                                             | <input type="checkbox"/> <i>Ateles paniscus</i>                 | <input type="checkbox"/> <i>Cercocebus</i>                  |                                                          |
|                                                             | <input type="checkbox"/> <i>Ateles fusciceps rufiventris</i>    |                                                             |                                                          |
|                                                             | <input type="checkbox"/> <i>Pithecia pithecia</i>               |                                                             |                                                          |
|                                                             | <input type="checkbox"/> <i>Chiropotes satanas</i>              |                                                             |                                                          |
|                                                             | <input type="checkbox"/> <i>Sapajus xanthosternos</i>           |                                                             |                                                          |
|                                                             | <input type="checkbox"/> <i>Cebus apella</i>                    |                                                             |                                                          |
|                                                             | <input type="checkbox"/> <i>Cebus capucinus</i>                 |                                                             |                                                          |
|                                                             | <input type="checkbox"/> <i>Alouatta spp.</i>                   |                                                             |                                                          |

|  |  |                                                                                                                                                                                                                               |  |
|--|--|-------------------------------------------------------------------------------------------------------------------------------------------------------------------------------------------------------------------------------|--|
|  |  | <i>torquatus</i><br><input type="checkbox"/> <i>Mandrillus sphinx</i><br><input type="checkbox"/> <i>Colobus spp.</i><br><input type="checkbox"/> <i>Procolobus spp.</i><br><input type="checkbox"/> <i>Piliocolobus spp.</i> |  |
|--|--|-------------------------------------------------------------------------------------------------------------------------------------------------------------------------------------------------------------------------------|--|

**HOW MANY SAMPLES ARE YOU WILLING TO SEND (ideally one three-day pooled sample/species):**  
**AT WHAT TIME OF THE YEAR COULD YOU SEND THE SAMPLES:**
