# Supplementary material for: Gastrointestinal parasites in non-human primates in zoological institutions in France
Source: PubMed Central journal article supplement (PMC9487514; doi:10.1051/parasite/2022040), 2022-09-20
Supplement: parasite-29-43-s2.pdf [file parasite-29-43-s2.pdf]

## Supplementary data II

List of non-human primate species represented in the study

| <b>Suborder</b>                     | <b>Family</b>         | <b>Genera</b>        | <b>Species</b>      |                      |                    |
|-------------------------------------|-----------------------|----------------------|---------------------|----------------------|--------------------|
| <b>Strepsirrhini</b>                | Cheirogaleidae        | <i>Microcebus</i>    | <i>Murinus</i>      |                      |                    |
|                                     | Indridae              | <i>Propithecus</i>   | <i>Coronatus</i>    |                      |                    |
|                                     | Galagidae             | <i>Galago</i>        | <i>Senegalensis</i> |                      |                    |
|                                     | Lemuridae             |                      | <i>Eulemur</i>      | <i>Albifrons</i>     |                    |
|                                     |                       |                      |                     | <i>Cinereiceps</i>   |                    |
|                                     |                       |                      |                     | <i>Coronatus</i>     |                    |
|                                     |                       |                      |                     | <i>flavifrons</i>    |                    |
|                                     |                       |                      |                     | <i>macaco</i>        |                    |
|                                     |                       |                      |                     | <i>mongoz</i>        |                    |
|                                     |                       |                      |                     | <i>rubriventer</i>   |                    |
|                                     |                       |                      |                     | <i>Lemur</i>         | <i>catta</i>       |
|                                     |                       |                      |                     | <i>Haplemur</i>      | <i>alaotrensis</i> |
|                                     |                       |                      |                     | <i>Prolemur</i>      | <i>simus</i>       |
|                                     |                       | <i>Varecia</i>       | <i>rubra</i>        |                      |                    |
|                                     |                       | <i>variegata</i>     |                     |                      |                    |
| <b>Haplorhini –<br/>Platyrrhini</b> | Aotidae               | <i>Aotus</i>         | <i>griseimembra</i> |                      |                    |
|                                     | Atelidae              | <i>Alouatta</i>      | <i>caraya</i>       |                      |                    |
|                                     |                       | <i>Ateles</i>        | <i>chamek</i>       |                      |                    |
|                                     |                       |                      | <i>fusciceps</i>    |                      |                    |
|                                     |                       |                      | <i>geoffroyi</i>    |                      |                    |
|                                     |                       |                      | <i>hybridus</i>     |                      |                    |
|                                     |                       |                      | <i>scireus</i>      |                      |                    |
|                                     | Cebidae               | <i>Saimiri</i>       |                     | <i>boliviensis</i>   |                    |
|                                     |                       |                      |                     | <i>bicolor</i>       |                    |
|                                     |                       | <i>Saguinus</i>      |                     | <i>imperator</i>     |                    |
|                                     |                       |                      |                     | <i>midas</i>         |                    |
|                                     |                       |                      |                     | <i>mystax</i>        |                    |
|                                     |                       |                      |                     | <i>oedipus</i>       |                    |
|                                     |                       |                      |                     | <i>apella</i>        |                    |
|                                     |                       |                      |                     | <i>xanthosternos</i> |                    |
|                                     |                       | Callithricidae       | <i>Callimico</i>    | <i>goeldii</i>       |                    |
|                                     |                       |                      | <i>Callithrix</i>   | <i>jacchus</i>       |                    |
|                                     |                       |                      | <i>geoffroyi</i>    |                      |                    |
|                                     | <i>Cebuella</i>       |                      | <i>pygmaea</i>      |                      |                    |
|                                     | <i>Leontopithecus</i> |                      | <i>chrysomelas</i>  |                      |                    |
|                                     |                       |                      | <i>rosalia</i>      |                      |                    |
|                                     |                       | <i>Mico</i>          | <i>argentinus</i>   |                      |                    |
| Pitheciidae                         | <i>Pithecia</i>       | <i>pithecia</i>      |                     |                      |                    |
|                                     | <i>Plecturocebus</i>  | <i>cupreus</i>       |                     |                      |                    |
|                                     |                       |                      |                     |                      |                    |
| <b>Haplorhini –<br/>Catarrhini</b>  | Cercopithecidae       | <i>Allochrocebus</i> | <i>lhoesti</i>      |                      |                    |
|                                     |                       | <i>Cercocebus</i>    | <i>atys</i>         |                      |                    |
|                                     |                       | <i>Cercopithecus</i> | <i>diana</i>        |                      |                    |
|                                     |                       |                      | <i>hamlyni</i>      |                      |                    |
|                                     |                       |                      | <i>neglectus</i>    |                      |                    |
|                                     |                       |                      | <i>roloway</i>      |                      |                    |
|                                     |                       | <i>Colobus</i>       | <i>guereza</i>      |                      |                    |
|                                     |                       | <i>Lophocebus</i>    | <i>aterrimus</i>    |                      |                    |

|             |                       |                     |
|-------------|-----------------------|---------------------|
|             | <i>Macaca</i>         | <i>fascicularis</i> |
|             |                       | <i>nemestrina</i>   |
|             |                       | <i>nigra</i>        |
|             |                       | <i>mulatta</i>      |
|             |                       | <i>silenus</i>      |
|             |                       | <i>sylvanus</i>     |
|             |                       | <i>tonkeana</i>     |
|             | <i>Mandrillus</i>     | <i>sphinx</i>       |
|             | <i>Papio</i>          | <i>anubis</i>       |
|             |                       | <i>hamadryas</i>    |
|             |                       | <i>papio</i>        |
|             | <i>Trachypithecus</i> | <i>francoisi</i>    |
|             |                       | <i>gelada</i>       |
| Hylobatidae | <i>Hylobates</i>      | <i>Lar</i>          |
|             | <i>Nomascus</i>       | <i>gabriellae</i>   |
|             |                       | <i>leucogenys</i>   |
|             |                       | <i>siki</i>         |
|             | <i>Symphalangus</i>   | <i>syndactylus</i>  |
| Pongidae    | <i>Pongo</i>          | <i>pygmaeus</i>     |
| Hominidae   | <i>Gorilla</i>        | <i>gorilla</i>      |
|             | <i>Pan</i>            | <i>troglodytes</i>  |
